# Supplementary material
Source: MDPI journal article supplement (https://www.mdpi.com/2073-4352/11/11/1280)
Supplement: s1 [file s1]

Supplementary Information

# Morphological: Optical, and Mechanical Characterizations of Non-activated and Activated Nanocomposites of SG and MWCNTs

Mohammed S. Alotaibi, Norah H. Almousa, Mohammed A. Asaker, Fahad S. Alkasmoul, Nezar H. Khdary and Maha M. Khayyat \*

King Abdulaziz City for Science and Technology (KACST), Riyadh 11442, Saudi Arabia; msaalo-taibi@kacst.edu.sa (M.S.A.); nalmousa@kacst.edu.sa (N.H.A.); masaker@kacst.edu.sa (M.A.A.); fkass-moul@kacst.edu.sa (F.S.A.); nkhdary@kacst.edu.sa (N.H.K.)

\* Correspondence: mkhayyat@kacst.edu.sa

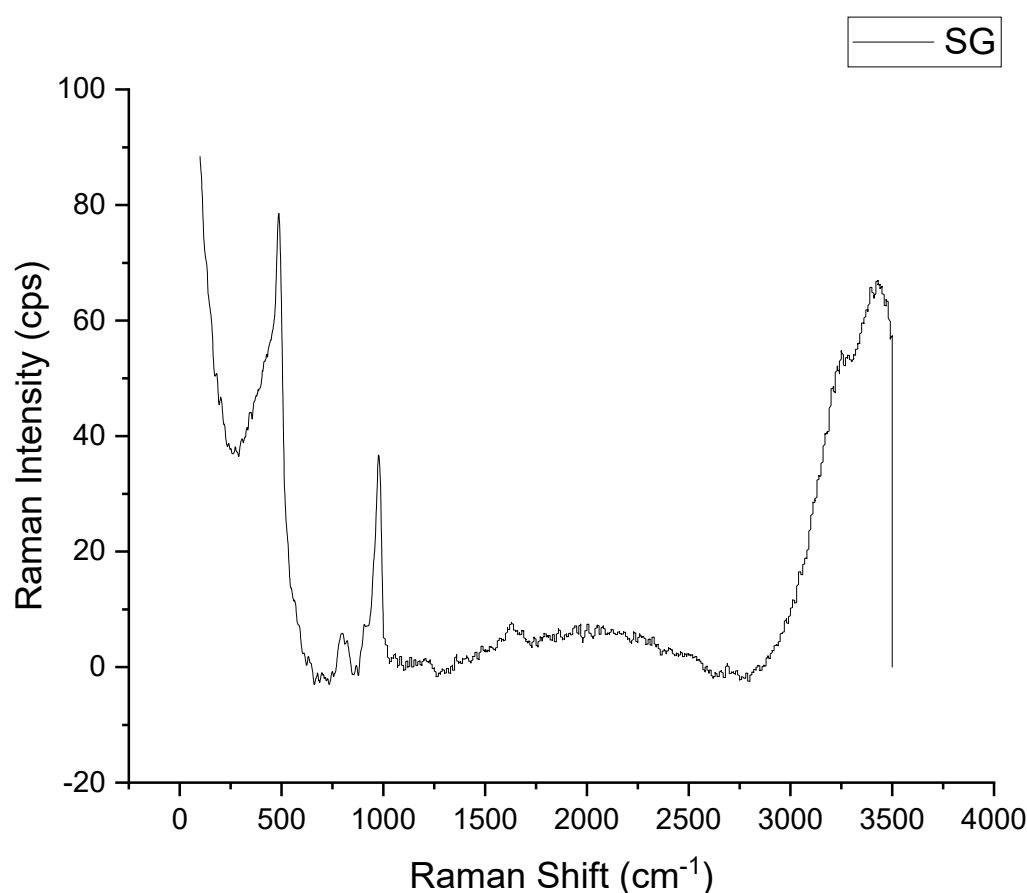

**Figure S1.** Raman spectrum of silica gel. There are sharp peaks at 480, 780, and 990  $\text{cm}^{-1}$  and a broad band centered at 2100  $\text{cm}^{-1}$  in addition to two Scheme 3250. and 3400  $\text{cm}^{-1}$ .

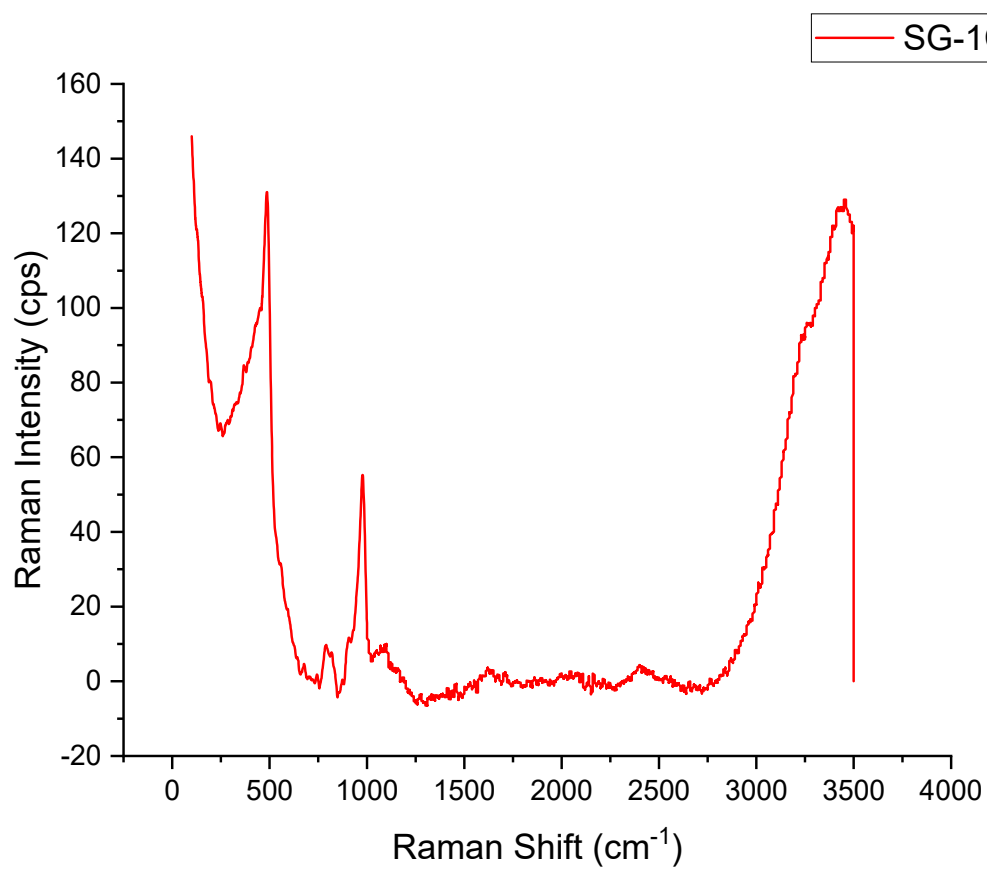

**Figure S2.** Raman scattering spectrum of silica gel and 0.25 wt% MWCNT composite.

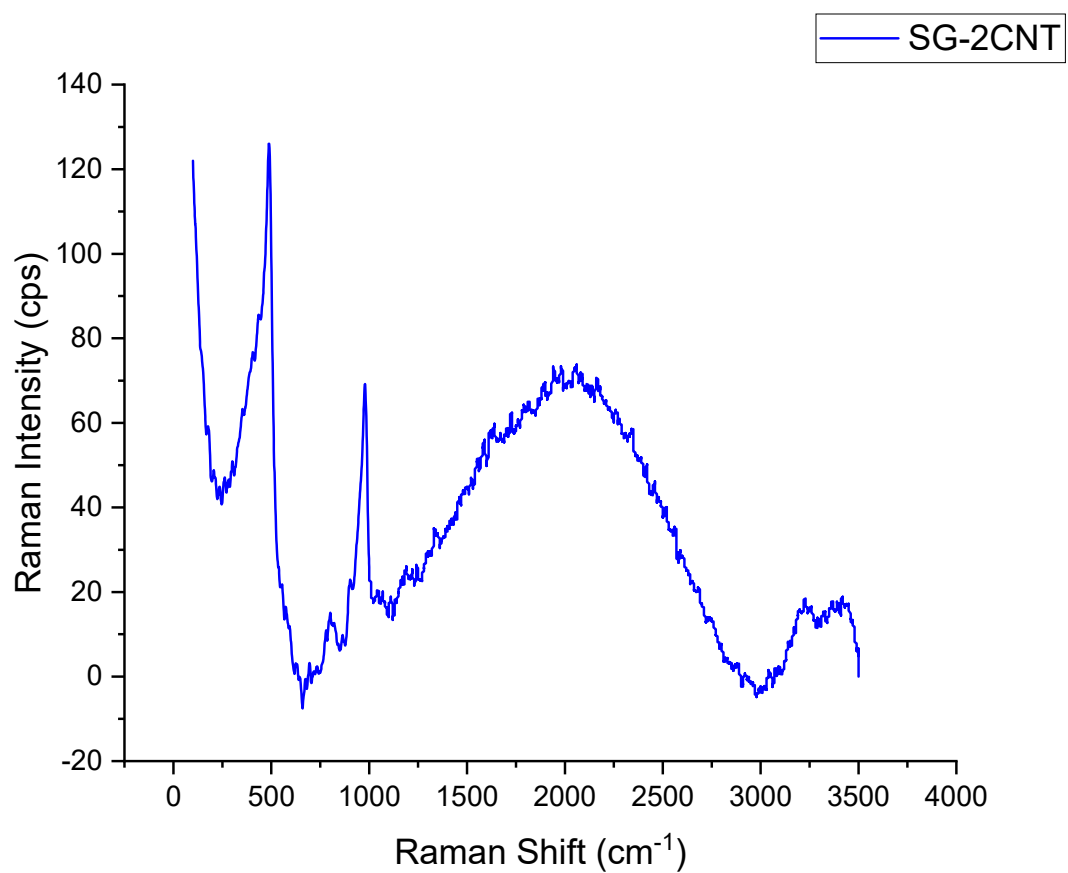

**Figure S3.** Raman scattering spectrum of silica gel and 0.50 wt% MWCNT composite.

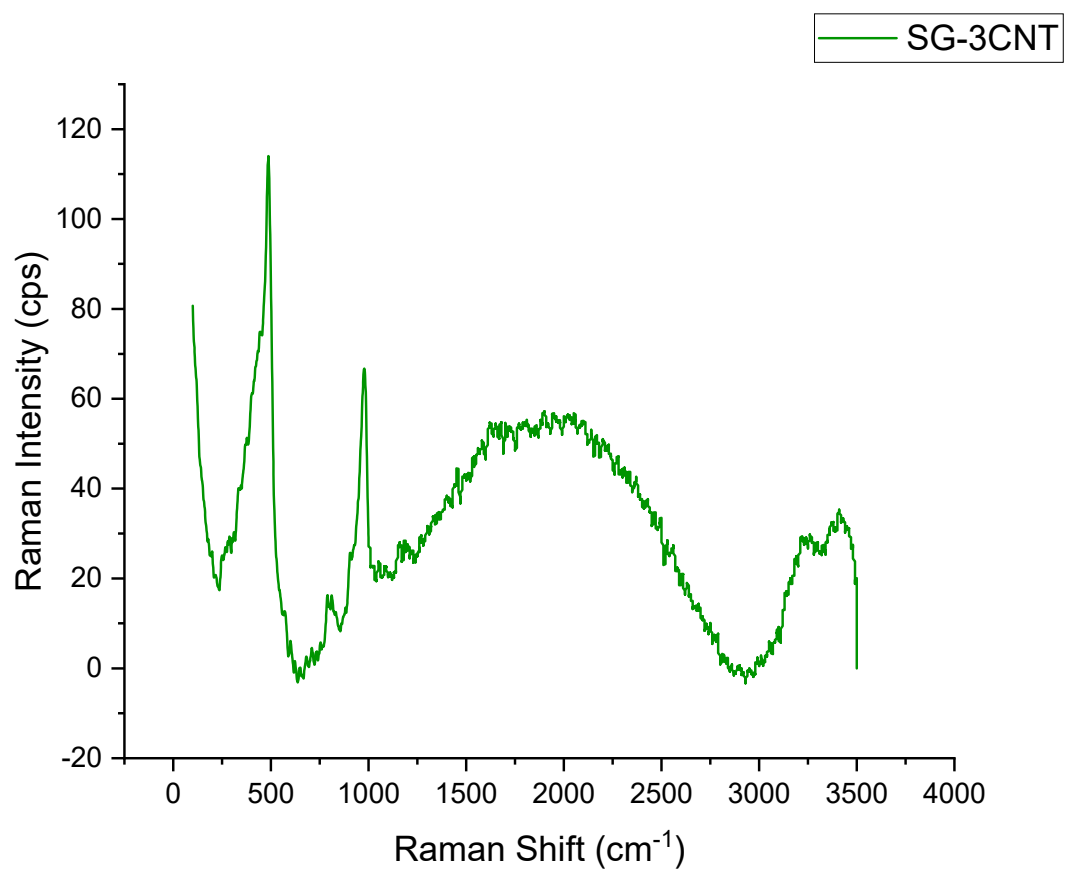

**Figure S4.** Raman scattering spectrum of silica gel and 0.75 wt% MWCNT composite.

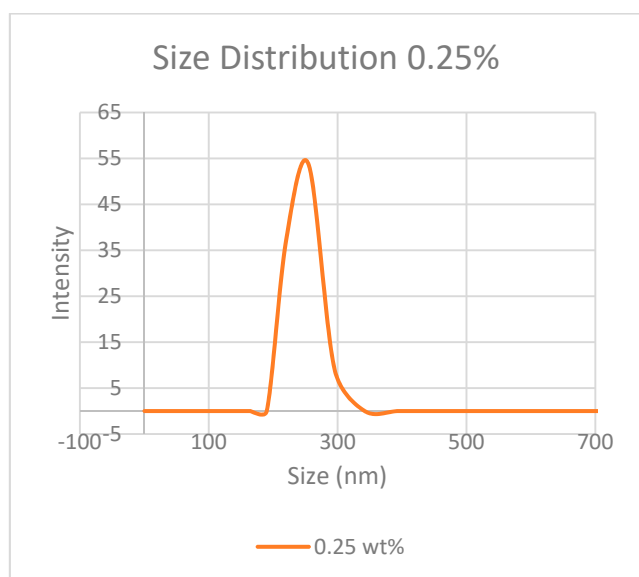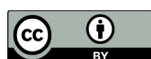

**Copyright:** © 2021 by the authors. Licensee MDPI, Basel, Switzerland. This article is an open access article distributed under the terms and conditions of the Creative Commons Attribution (CC BY) license (<http://creativecommons.org/licenses/by/4.0/>).

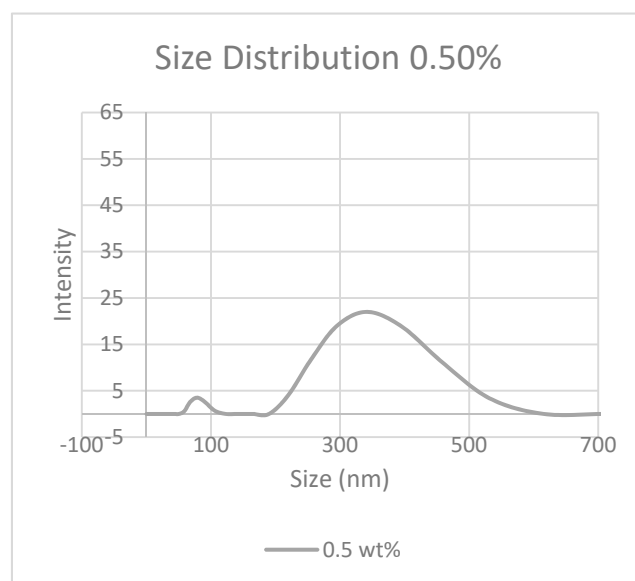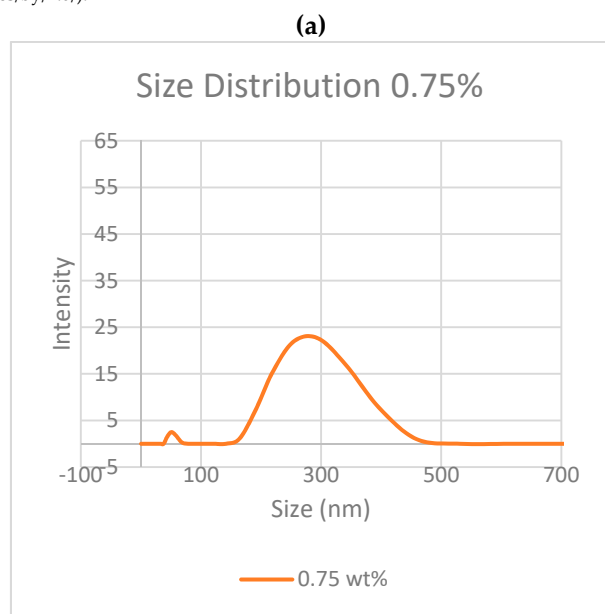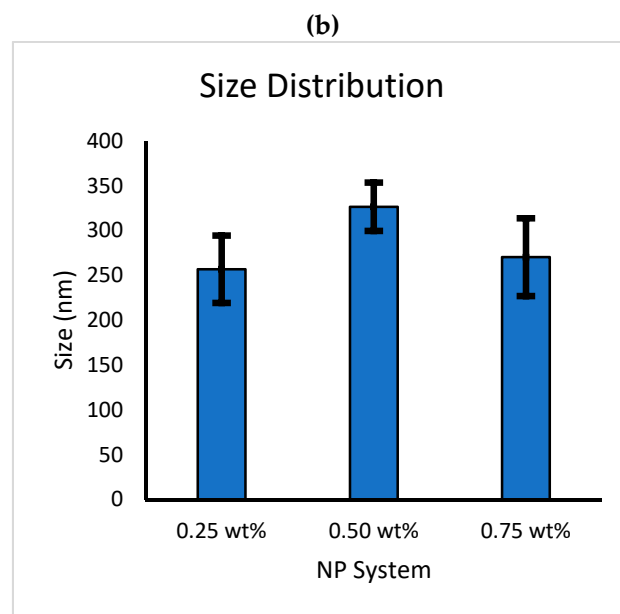

**Figure S5.** Zetasizer spectra of intensity vs. particle size distribution at various concentrations of MWCNTs in the silica gel composites: (a) 0.25 wt%; (b) 0.5 wt%; (c) 0.75 wt%. (d) Bar chart shows statistical analysis size distributions of MWCNTs in composites; marks on each bar indicate standard deviations in size measurements.
